# Supplementary material for: Hypothalamic CRH neurons represent physiological memory of positive and negative experience
Source: PubMed Central journal article supplement (PMC10739955; doi:10.1038/s41467-023-44163-5), 2023-12-21
Supplement: 41467_2023_44163_MOESM1_ESM.pdf [file 41467_2023_44163_MOESM1_ESM.pdf]

1 **Hypothalamic CRH neurons represent physiological memory of positive and**  
2 **negative experience**

3 **Supplementary Figures**

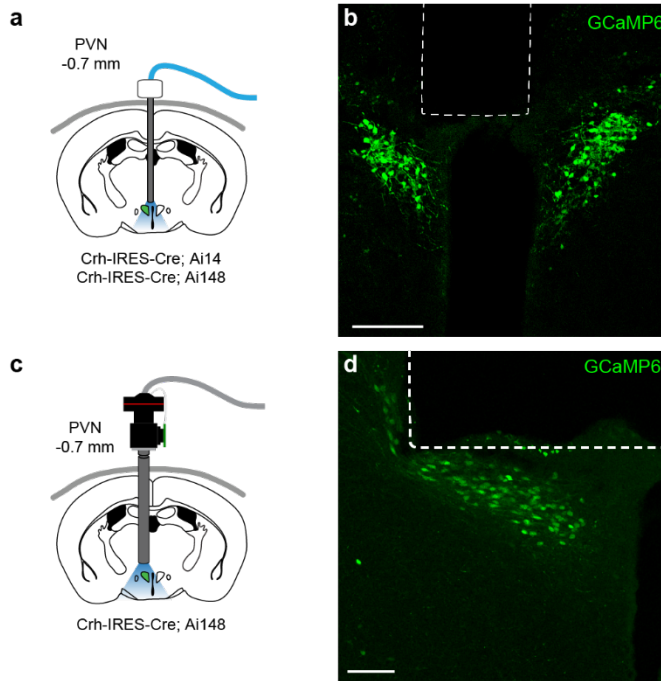

4 **Supplementary Fig. 1. Implantations for fiber photometry and miniature microscopy.**  
5 **a**, Schematic illustration of ferrule placement. **b**, Low magnification confocal image shows the fiber photometry  
6 ferrule implantation site (dashed line) dorsal of the paraventricular nucleus of the hypothalamus (PVN). **c**,  
7 Schematic illustration of GRIN lens placement. **d**, Low magnification confocal image shows the lens implantation  
8 site (dashed line) dorsal of the PVN. Scale bar, **b**, 200  $\mu\text{m}$ , **d**, 100  $\mu\text{m}$ .  
9

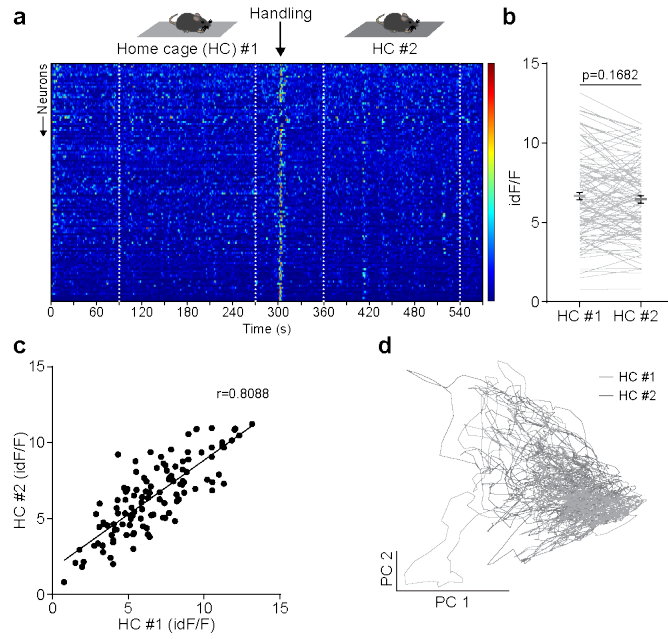

10  
11  
12  
13  
14  
15  
16

**Supplementary Fig. 2. Impact of handling on CRH<sup>PVN</sup> activity.**

**a**, Heat maps show the activity of identified neurons before (#1) and after (#2) handling in the home cage (HC). **b**, Activity of identified units during HC#1 and HC#2 ( $p=0.1682$ ,  $n=116$  cells,  $N=4$  animals,  $t=0.1387$ , paired two-tailed t-test). **c**, Correlation of neuronal activity between HC#1 and HC#2 ( $p<10^{-15}$ ,  $r=0.8088$ , linear regression). **d**, Principal component analysis result shows the relationship of neuronal activities between HC#1 and HC#2. Data are mean  $\pm$  s.e.m. Scale bar, **a**, 0-100 idF/F.

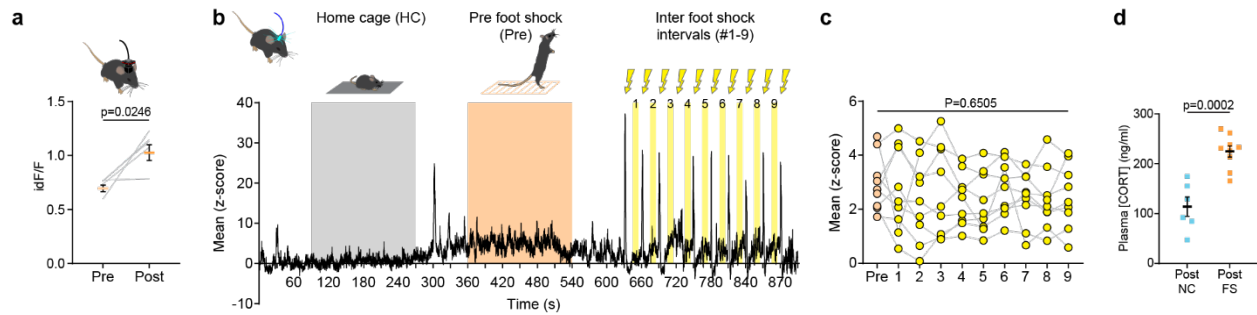

17

18

19

20

21

22

23

24

25

**Supplementary Fig. 3. Population activity of CRH<sup>PVN</sup> neurons upon exposures to foot shocks and foot shock context.**

**a**, Activity of identified units pooled by animals neurons during Pre and Post ( $p=0.0246$ ,  $n=5$  animals,  $t=3.515$ , paired two-tailed t-test). **b**, Illustrative fiber photometry trace showing the 3 min-long time segments of home cage (HC) and context (Pre) exposures before foot shock, as well as the 10 sec-long segments between foot shocks used for further analysis. **c**, The mean of CRH<sup>PVN</sup> neurons population activity before and between repeated foot shocks ( $P=0.6505$ ,  $n=9$  mice,  $F(9,72)=0.7630$ , repeated measures 1-way ANOVA). **d**, Corticosterone response to re-exposure to neutral (NC) and foot shock (FS) context ( $p=0.0002$ ,  $t=5.276$ , two-tailed t-test). Data are mean  $\pm$  s.e.m.

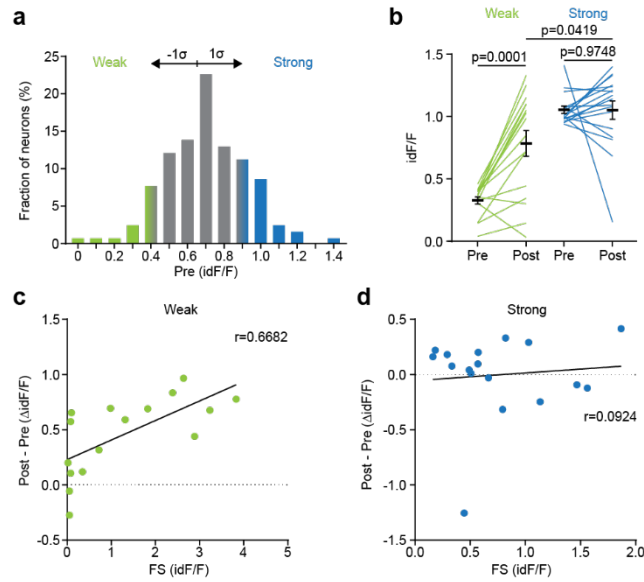

26

27 **Supplementary Fig. 4. Clustering of CRH<sup>PVN</sup> neurons based standard deviation.**

28 **a**, Distribution of CRH<sup>PVN</sup> activity. Neurons with an anticipatory activity more than  $1\sigma$  away from the mean were  
 29 grouped as Weak and Strong anticipator neurons. **b**, Neuronal activity in Pre and Post of Weak and Strong  
 30 anticipatory neurons (Weak,  $p=1.076 \times 10^{-4}$ ,  $n=16$  cells,  $t=5.201$ , paired two-tailed t-test); (Strong,  $p=0.9748$ ,  $n=17$   
 31 cells,  $t=0.0320$ , paired two-tailed t-test). Comparison whether the subpopulations are still distinguishable on Post  
 32 ( $p=0.0419$ ,  $t=2.122$ , two-tailed t-test). **c**, Correlation between foot shock (FS) and the subsequent activity increase  
 33 observed on Post of Weak neurons ( $p=0.0047$ ,  $r=0.6682$ , linear regression). **d**, Correlation between FS and the  
 34 subsequent activity increase observed on Post of Strong neurons ( $p=0.7244$ ,  $r=0.0924$ , linear regression). Data are  
 35 mean  $\pm$  s.e.m.

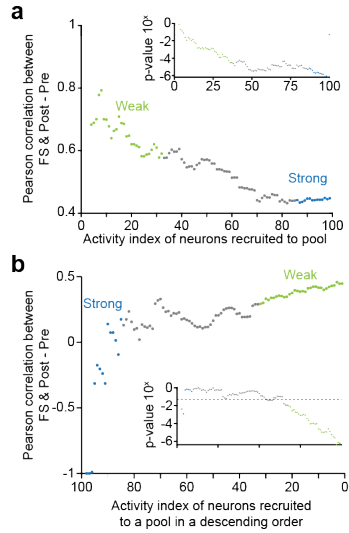

36  
 37  
 38  
 39  
 40  
 41  
 42  
 43

**Supplementary Fig. 5. The level of anticipatory activity defines the correlation between the foot shock response and the activity update.**

**a**, Plot of Pearson correlation results between foot shock (FS) and subsequent CRH<sup>PVN</sup> activity is estimated between the population of neurons that have the *k*th percentile of anticipatory activities for increasing *k*. Inset shows the calculated p values of the correlations. Colors indicate the inclusion of neurons formerly clustered as Weak and Strong anticipatory neurons. **b**, Same correlation plot as neurons are included in the analysis in a descending order based on anticipatory activity. Inset shows the calculated p values of the correlations.

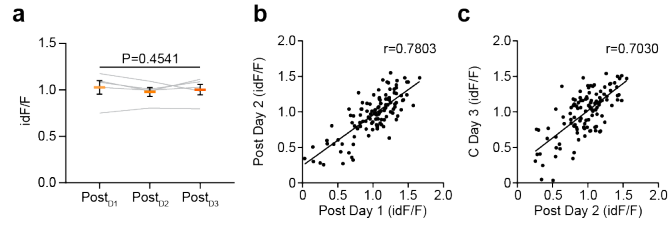

44

45 **Supplementary Fig. 6. Day-to-day neuronal activity correlations upon repeated exposures to foot shock.**

46 **a**, Activity of identified units pooled by animals is similar during all repeated exposures to the foot shock context  
 47 ( $P=0.4541$ ,  $n=5$  mice,  $F(2,8)=0.8726$ , repeated measures 1-way ANOVA). **b**, Correlation of neuronal activity  
 48 between  $\text{Post}_{\text{Day } 1}$  and  $\text{Post}_{\text{Day } 2}$  ( $p < 10^{-15}$ ,  $r=0.7803$ , linear regression). **c**, Correlation of neuronal activity between  
 49  $\text{Post}_{\text{Day } 2}$  and  $\text{Post}_{\text{Day } 3}$  ( $p < 10^{-15}$ ,  $r=0.7030$ , linear regression). Data are mean  $\pm$  s.e.m.

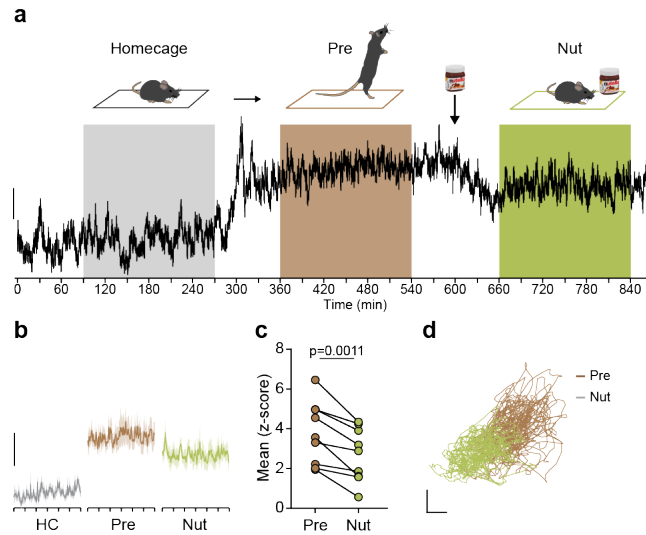

50  
51  
52  
53  
54  
55  
56  
57  
58

**Supplementary Fig. 7. Immediate and contextual effects of appetitive stimulus on the CRH<sup>PVN</sup> population activity.**

**a**, Illustrative fiber photometry trace showing the 3 min-long time segments of home cage (HC), the context prior the presentation of the hazelnut spread (Pre) and the presentation of the spread in the context (Nut). **b**, Mean traces during HC, Pre and Nut. **c**, Quantification of the mean amplitudes during the different states ( $p=0.0011$ ,  $n=9$  mice,  $t=4.952$ , paired two-tailed t-test). **d**, Principal component analysis of CRH<sup>PVN</sup> activity before and during hazelnut exposure in the neutral context. Scale bars, **a**, **b**, 2 z-score. Data are mean  $\pm$  s.e.m.

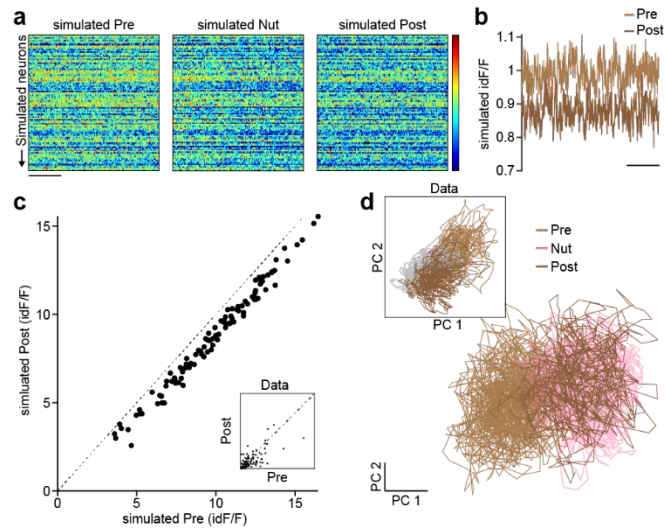

59

60 **Supplementary Fig. 8. Updating rule for endocrine appetitive memory.**

61 **a**, Simulated calcium indicator in the Pre, Nut, and Post. **b**, The simulated calcium indicator decreases on Post. **c**,

62 Change in simulated calcium indicator variable (with data inset). **d**, Principal component analysis plots of the

63 simulated network (with data inset). Scale bar, **a**, **b**, 30 s.



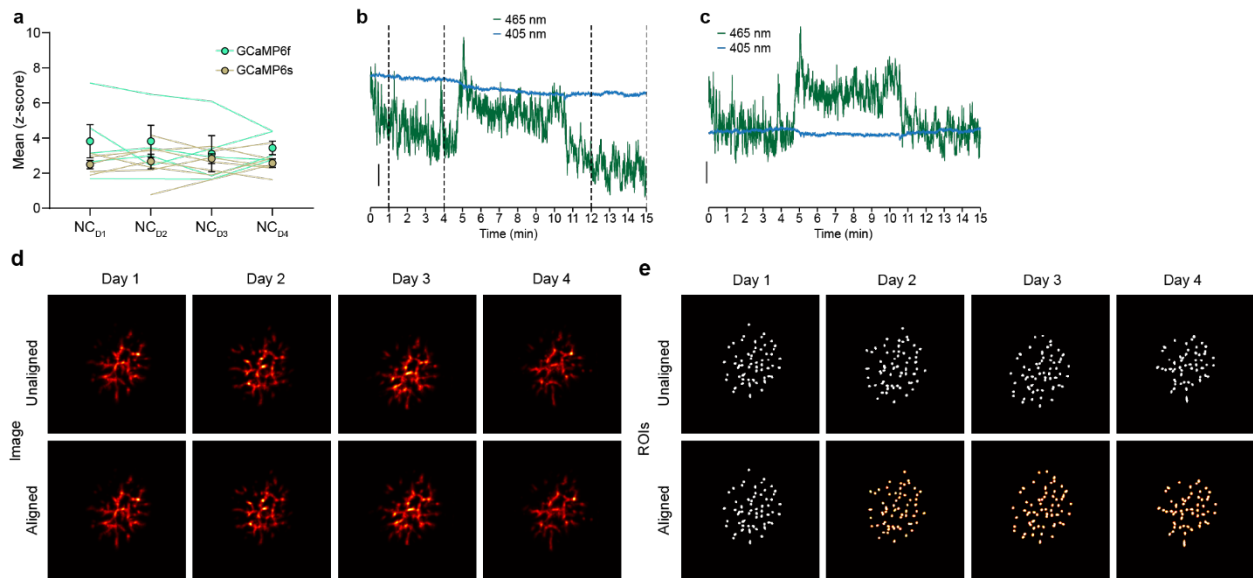

64

65 **Supplementary Fig. 9. Fiber photometry data analysis and longitudinal alignment of neurons recorded by**  
 66 **miniature microscopy.**

67 **a**, Mean amplitude recorded during repeated exposure to a neutral environment using the expression of GCaMP6f  
 68 or GCaMP6s in CRH<sup>PVN</sup> neurons ( $P=0.2015$ ;  $F(1,10)=1.870$ ; mixed effects two-way ANOVA). **b,c**, Fiber photometry  
 69 traces before (**b**) and after (**c**) bleaching correction show the raw recording of the GCaMP signal (465 nm, red) and  
 70 the control channel (405 nm, blue) used for motion correction. The section between the dashed lines shows the  
 71 time period used for bleaching correction. **d,e**, Neuronal alignment is based on the summarized images and the  
 72 regions of interest (ROIs) provided by Min1pipe. **d**, Summary images before (top) and after (bottom) alignment. **e**,  
 73 Selected ROIs before (top) and after (bottom) alignment. Scale bars: **b, c**, 20 mV. Data are mean  $\pm$  s.e.m.

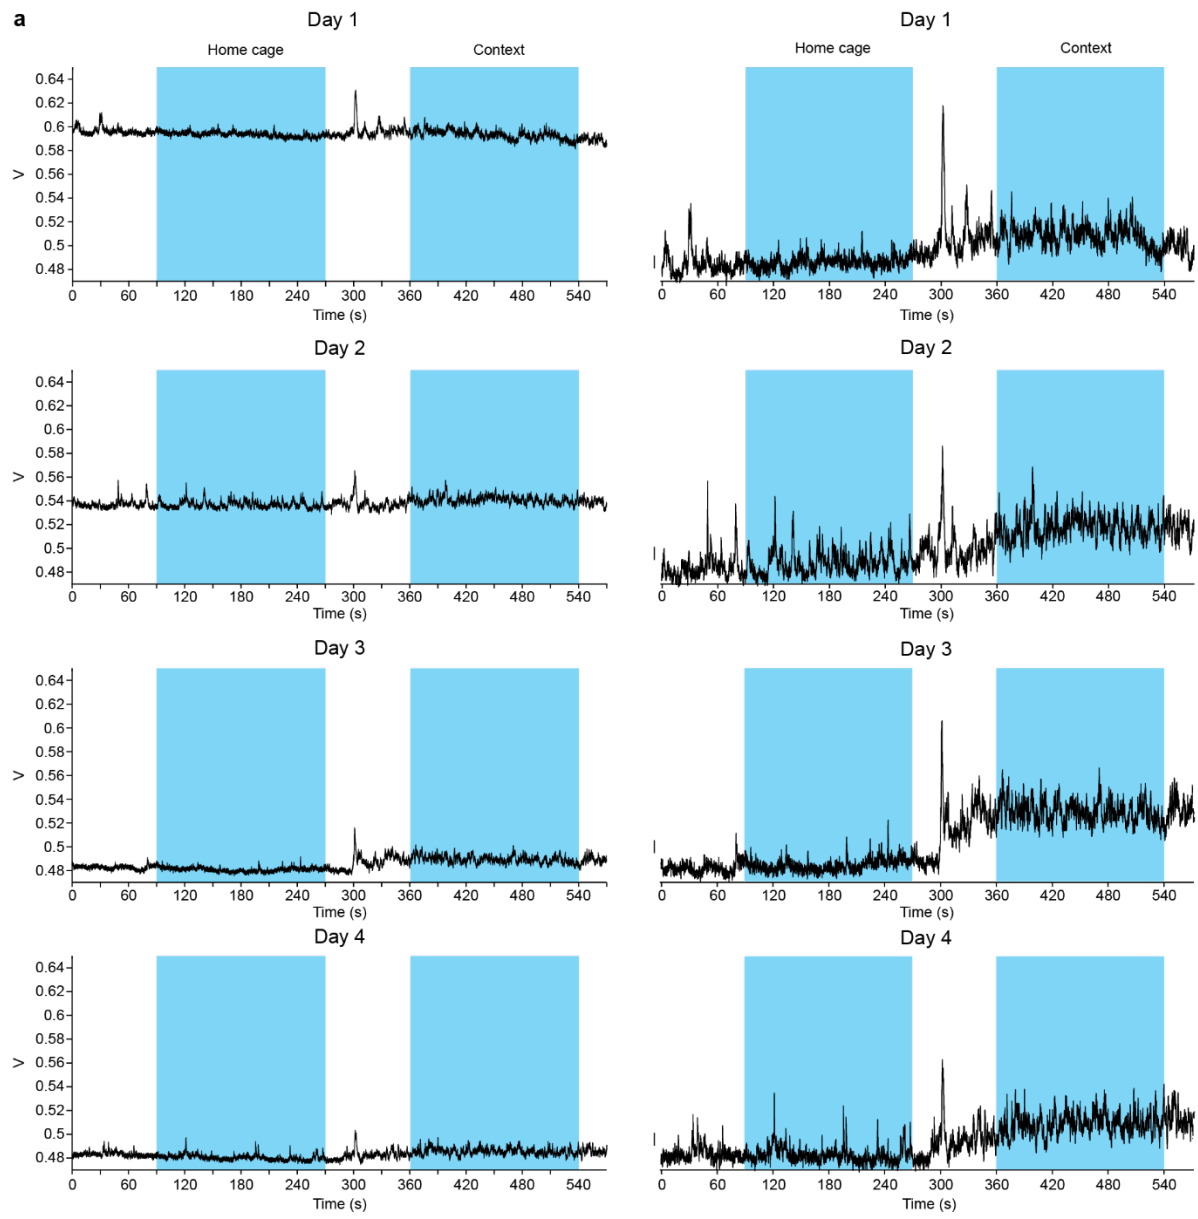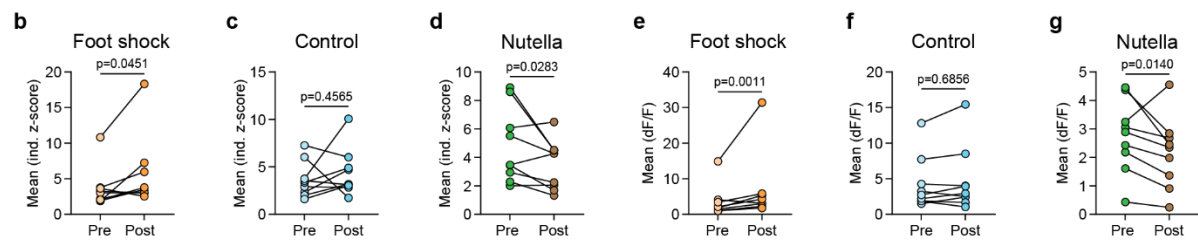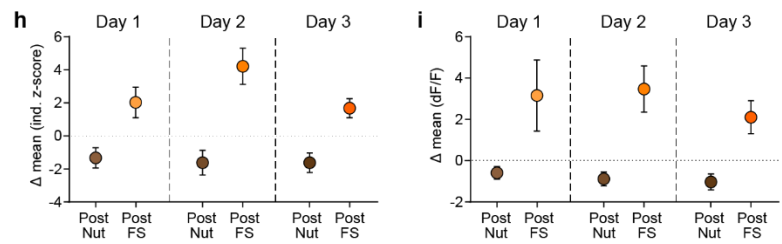

75 **Supplementary Fig. 10. Photometry recordings on consecutive days.**  
76 **a**, Illustrative fiber photometry traces of repeated context exposures on consecutive days. Raw traces on the left  
77 column, bleaching and motion corrected z-score calculated counterparts are on the right. Highlighted segments  
78 are used for further analysis. **b-d**, Results of photometry data analyses using z-score calculated independently from  
79 other experiments (ind. z-score) before and after foot shock (**b**,  $p=0.0451$ ,  $n=9$  mice,  $t=2.372$ , ratio paired two-  
80 tailed t-test), control exposure (**c**,  $p=0.4565$ ,  $n=9$  mice,  $t=0.7824$ , ratio paired two-tailed t-test) and Nutella (**d**,  
81  $p=0.0283$ ,  $n=9$  mice,  $t=2.672$ , ratio paired two-tailed t-test). **e-g**, Results of photometry data analyses using  $dF/F$   
82 calculations before and after foot shock (**e**,  $p=0.0011$ ,  $n=9$  mice,  $t=4.990$ , ratio paired two-tailed t-test), control  
83 exposure (**f**,  $p=0.6856$ ,  $n=9$  mice,  $t=0.4199$ , ratio paired two-tailed t-test) and Nutella (**g**,  $p=0.0140$ ,  $n=9$  mice,  
84  $t=3.131$ , ratio paired two-tailed t-test). **h**, Relative changes of population activity recorded using single fiber  
85 photometry during all re-exposures to the hazelnut context (Nut,  $\text{PostDay 1} - \text{PostDay 3}$ :  $P=0.6717$ ,  $F(2,16)=0.4081$ ,  
86 mixed-effects model) and foot shock context (FS,  $\text{PostDay 1} - \text{PostDay 3}$ :  $P=0.2875$ ,  $F(2,26)=1.308$ , mixed-effects model)  
87 using z-score calculated independently from other experiments (ind. z-score). Comparison of the valence effects  
88 (Nut vs FS:  $P=0.0002$ ,  $F(1,16)=22.11$ , mixed-effects 2-way ANOVA). **i**, Relative changes of population activity  
89 recorded using single fiber photometry during all re-exposures to the hazelnut context (Nut,  $\text{PostDay 1} - \text{PostDay 3}$ :  
90  $P=0.0611$ ,  $F(2,16)=3.347$ , mixed-effects model) and foot shock context (FS,  $\text{PostDay 1} - \text{PostDay 3}$ :  $P=0.9868$ ,  
91  $F(2,26)=0.0133$ , mixed-effects model) using  $dF/F$  calculations. Comparison of the valence effects (Nut vs FS:  
92  $P=0.0074$ ,  $F(1,16)=9.402$ , mixed-effects 2-way ANOVA). Scale bars, **a**, 2 z-score.

93  
94

95 **Supplementary Tables**

96

| Figure panel  | Groups                                 | dimension | P                       | n                 | t / F         | test                          |
|---------------|----------------------------------------|-----------|-------------------------|-------------------|---------------|-------------------------------|
| Fig 1e        | HC: $0.05 \pm 0.1$                     | z-score   | 0.0001                  | 10 mice           | t=6.34        | paired two-tailed t-test      |
|               | NC: $3.16 \pm 0.51$                    |           |                         |                   |               |                               |
| Fig 1g        | HC: $0.41 \pm 0.02$                    | idF/F     | $1.057 \times 10^{-17}$ | 96 cells, 4 mice  | t=10.56       | paired two-tailed t-test      |
|               | NC: $0.92 \pm 0.03$                    |           |                         |                   |               |                               |
| Fig 2b        | Pre: $2.96 \pm 0.34$                   | z-score   | 0.0079                  | 9 mice            | t=3.514       | paired two-tailed t-test      |
|               | Post: $4.69 \pm 0.67$                  |           |                         |                   |               |                               |
| Fig 2d        | Pre: $0.69 \pm 0.02$                   | idF/F     | $6.634 \times 10^{-16}$ | 115 cells, 5 mice | t=9.409       | paired two-tailed t-test      |
|               | Post: $1.01 \pm 0.03$                  |           |                         |                   |               |                               |
| Fig 2f        | Pre: $3.32 \pm 0.54$                   | z-score   | 0.7772                  | 9 mice            | t=0.2927      | paired two-tailed t-test      |
|               | Post: $3.23 \pm 0.43$                  |           |                         |                   |               |                               |
| Fig 2h        | Pre: $0.92 \pm 0.03$                   | idF/F     | 0.576                   | 96 cells, 4 mice  | t=0.5612      | paired two-tailed t-test      |
|               | Post: $0.93 \pm 0.03$                  |           |                         |                   |               |                               |
| Fig 2k Weak   | Pre: $0.44 \pm 0.02$                   | idF/F     | $2.952 \times 10^{-10}$ | 37 cells          | t=8.602       | paired two-tailed t-test      |
|               | Post: $0.96 \pm 0.07$                  |           |                         |                   |               |                               |
| Fig 2k Strong | Pre: $1.06 \pm 0.03$                   | idF/F     | 0.9748                  | 17 cells          | t=0.032       | paired two-tailed t-test      |
|               | Post: $1.05 \pm 0.07$                  |           |                         |                   |               |                               |
| Fig 2k Post   | Weak: $0.96 \pm 0.07$                  | idF/F     | 0.4115                  | 37 cells          | t=0.8279      | two-tailed t-test             |
|               | Strong: $1.05 \pm 0.07$                |           |                         | 17 cells          |               |                               |
| Fig 2n Weak   | Pre: $0.44 \pm 0.04$                   | idF/F     | 0.0253                  | 15 cells          | t=2.504       | paired two-tailed t-test      |
|               | Post: $0.56 \pm 0.07$                  |           |                         |                   |               |                               |
| Fig 2n Strong | Pre: $1.27 \pm 0.03$                   | idF/F     | 0.0019                  | 28 cells          | t=3.45        | paired two-tailed t-test      |
|               | Post: $1.12 \pm 0.04$                  |           |                         |                   |               |                               |
| Fig 2n Post   | Weak: $0.56 \pm 0.07$                  | idF/F     | $2.670 \times 10^{-05}$ | 15 cells          | t=7.617       | two-tailed t-test             |
|               | Strong: $1.12 \pm 0.04$                |           |                         | 28 cells          |               |                               |
| Fig 2o        | Weak: $1.54 \pm 0.21$                  | idF/F     | 0.0156                  | 37 cells          | t=2.501       | two-tailed t-test             |
|               | Strong: $0.71 \pm 0.12$                |           |                         | 17 cells          |               |                               |
| Fig 4b        | Post <sub>Day 1</sub> : $69.1 \pm 8.6$ | s         | $5.638 \times 10^{-10}$ | 15 mice           | F(2,28)=50.09 | repeated measures 1-way ANOVA |
|               | Post <sub>Day 2</sub> : $20.8 \pm 4.9$ |           |                         |                   |               |                               |
|               | Post <sub>Day 3</sub> : $8.7 \pm 3.6$  |           |                         |                   |               |                               |

97

|               |                                      |         |                                                         |                   |                |                                   |
|---------------|--------------------------------------|---------|---------------------------------------------------------|-------------------|----------------|-----------------------------------|
| Fig 4c        | Post <sub>Day 1</sub> : 151.8 ± 8.1  | ng/ml   | 0.3655                                                  | 8 mice            | F(2,14)=1.082  | repeated measures 1-way ANOVA     |
|               | Post <sub>Day 2</sub> : 171.5 ± 10.3 |         |                                                         |                   |                |                                   |
|               | Post <sub>Day 3</sub> : 147.6 ± 15.7 |         |                                                         |                   |                |                                   |
| Fig 4e        | Post <sub>Day 1</sub> : 4.88 ± 0.50  | z-score | 0.2722                                                  | 13 mice           | F(2,26)=1.369  | mixed effects model               |
|               | Post <sub>Day 2</sub> : 5.61 ± 0.56  |         |                                                         | 15 mice           |                |                                   |
|               | Post <sub>Day 3</sub> : 4.94 ± 0.42  |         |                                                         | 16 mice           |                |                                   |
| Fig 4f        | Post <sub>Day 1</sub> : 1.01 ± 0.03  | idF/F   | 0.1003                                                  | 115 cells, 5 mice | F(2,228)=2.323 | repeated measures 1-way ANOVA     |
|               | Post <sub>Day 2</sub> : 0.96 ± 0.03  |         |                                                         |                   |                |                                   |
|               | Post <sub>Day 3</sub> : 0.99 ± 0.03  |         |                                                         |                   |                |                                   |
| Fig 5b        | Pre: 3.77 ± 0.52                     | z-score | 0.0116                                                  | 9 mice            | t=3.257        | paired two-tailed t-test          |
|               | Post: 2.65 ± 0.46                    |         |                                                         |                   |                |                                   |
| Fig 5d        | Pre: 4.64 ± 0.42                     | idF/F   | 0.0011                                                  | 90 cells, 5 mice  | t=3.362        | paired two-tailed t-test          |
|               | Post: 3.58 ± 0.34                    |         |                                                         |                   |                |                                   |
| Fig 5g Weak   | Pre: 2.14 ± 0.13                     | idF/F   | 0.6368                                                  | 51 cells          | t=0.4751       | paired two-tailed t-test          |
|               | Post: 2.27 ± 0.26                    |         |                                                         |                   |                |                                   |
| Fig 5g Strong | Pre: 11.09 ± 1.07                    | idF/F   | 0.0063                                                  | 17 cells          | t=3.144        | paired two-tailed t-test          |
|               | Post: 7.49 ± 1.18                    |         |                                                         |                   |                |                                   |
| Fig 5h Nut    | Post <sub>Day 1</sub> : -1.13 ± 0.35 | z-score | 0.3302                                                  | 9 mice            | F(2,16)=0.1188 | repeated measures 1-way ANOVA     |
|               | Post <sub>Day 2</sub> : -1.39 ± 0.35 |         |                                                         |                   |                |                                   |
|               | Post <sub>Day 3</sub> : -1.48 ± 0.36 |         |                                                         |                   |                |                                   |
| Fig 5h FS     | Post <sub>Day 1</sub> : 1.74 ± 0.49  | z-score | 2.063x10 <sup>-06</sup>                                 | 9 mice            | F(1,16)=52.05  | 2-way ANOVA                       |
|               | Post <sub>Day 2</sub> : 2.38 ± 0.52  |         |                                                         |                   |                |                                   |
|               | Post <sub>Day 3</sub> : 1.49 ± 0.44  |         |                                                         |                   |                |                                   |
| Fig 5i        | Post <sub>Day 1</sub> : 3.58 ± 0.35  | idF/F   | 0.055                                                   | 90 cells, 5 mice  | F(2,178)=5.368 | repeated measures 1-way ANOVA     |
|               | Post <sub>Day 2</sub> : 4.00 ± 0.37  |         |                                                         |                   |                |                                   |
|               | Post <sub>Day 3</sub> : 3.25 ± 0.30  |         |                                                         |                   |                |                                   |
|               |                                      |         | Post <sub>Day 1</sub> vs Post <sub>Day 3</sub> : 0.4470 |                   |                | Bonferroni's multiple comparisons |
| Supp. Fig 2b  | HC#1: 6.66 ± 0.25                    | idF/F   | 0.1682                                                  | 116 cells, 4 mice | t=0.1387       | paired two-tailed t-test          |
|               | HC#2: 6.45 ± 0.22                    |         |                                                         |                   |                |                                   |
| Supp. Fig 3a  | Pre: 0.70 ± 0.03                     | z-score | 0.0246                                                  | 5 mice            | t=3.515        | paired two-tailed t-test          |
|               | Post: 1.03 ± 0.07                    |         |                                                         |                   |                |                                   |
| Supp. Fig 3c  |                                      |         | 0.6505                                                  | 9 mice            | F(9,72)=0.7630 | repeated measures 1-way ANOVA     |
| Supp. Fig 3d  | NC Post: 114.0 ± 19.5                | ng/ml   | 0.0002                                                  | 6 mice            | t=5.276        | two-tailed t-test                 |
|               | FS Post: 224.7 ± 11.3                |         |                                                         | 9 mice            |                |                                   |

|                            |                                         |         |                        |                 |                |                                |
|----------------------------|-----------------------------------------|---------|------------------------|-----------------|----------------|--------------------------------|
| Supp. Fig 4b<br>Weak       | Pre: $0.33 \pm 0.03$                    | idF/F   | $1.076 \times 10^{-4}$ | 16 cells        | t=5.201        | paired two-tailed t-test       |
|                            | Post: $0.78 \pm 0.10$                   |         |                        |                 |                |                                |
| Supp. Fig 4b<br>Strong     | Pre: $1.06 \pm 0.03$                    | idF/F   | 0.9748                 | 17 cells        | t=0.032        | paired two-tailed t-test       |
|                            | Post: $1.05 \pm 0.07$                   |         |                        |                 |                |                                |
| Supp. Fig 4b<br>Post       | Weak Post: $0.78 \pm 0.10$              | idF/F   | 0.0419                 | 16 cells        | t=2.122        | two-tailed t-test              |
|                            | Strong Post: $1.05 \pm 0.07$            |         |                        | 17 cells        |                |                                |
| Supp. Fig 6a               | Post <sub>Day 1</sub> : $1.03 \pm 0.07$ | idF/F   | 0.4541                 | 5 mice          | F(2,8)=0.8726  | repeated measures 1-way ANOVA  |
|                            | Post <sub>Day 2</sub> : $0.98 \pm 0.05$ |         |                        |                 |                |                                |
|                            | Post <sub>Day 3</sub> : $1.00 \pm 0.06$ |         |                        |                 |                |                                |
| Supp. Fig 7c               | Pre: $3.77 \pm 0.52$                    | z-score | 0.0011                 | 9 mice          | t=4.952        | paired two-tailed t-test       |
|                            | Nut: $2.69 \pm 0.45$                    |         |                        |                 |                |                                |
| Supp. Fig 9a               |                                         |         | 0.2015                 | 4-5 vs 5-7 mice | F(1,10)=1.870  | mixed-effects 2-way ANOVA      |
| Supp. Fig 10b              | Pre: $3.61 \pm 0.94$                    | z-score | 0.0451                 | 9 mice          | t=2.372        | ratio paired two-tailed t-test |
|                            | Post: $5.64 \pm 1.67$                   |         |                        |                 |                |                                |
| Supp. Fig 10c              | Pre: $3.65 \pm 0.62$                    | z-score | 0.4565                 | 9 mice          | t=0.7824       | ratio paired two-tailed t-test |
|                            | Post: $4.40 \pm 0.83$                   |         |                        |                 |                |                                |
| Supp. Fig 10d              | Pre: $4.81 \pm 0.87$                    | z-score | 0.0283                 | 9 mice          | t=2.672        | ratio paired two-tailed t-test |
|                            | Post: $3.48 \pm 0.57$                   |         |                        |                 |                |                                |
| Supp. Fig 10e              | Pre: $3.42 \pm 1.48$                    | z-score | 0.0011                 | 9 mice          | t=4.99         | ratio paired two-tailed t-test |
|                            | Post: $6.57 \pm 3.14$                   |         |                        |                 |                |                                |
| Supp. Fig 10f              | Pre: $4.24 \pm 1.25$                    | z-score | 0.6856                 | 9 mice          | t=0.4199       | ratio paired two-tailed t-test |
|                            | Post: $4.72 \pm 1.52$                   |         |                        |                 |                |                                |
| Supp. Fig 10g              | Pre: $2.74 \pm 0.43$                    | z-score | 0.014                  | 9 mice          | t=3.131        | ratio paired two-tailed t-test |
|                            | Post: $2.15 \pm 0.42$                   |         |                        |                 |                |                                |
| Supp. Fig 10h              |                                         |         | 0.0002                 |                 | F(1,16)=22.11  | mixed-effects 2-way ANOVA      |
| Supp. Fig 10i<br>Nut       |                                         |         | 0.0611                 |                 | F(2,16)=3.347  | mixed effects model            |
| Supp. Fig 10i<br>FS        |                                         |         | 0.9868                 |                 | F(2,26)=0.0133 | mixed effects model            |
| Supp. Fig 10i<br>Nut vs FS |                                         |         | 0.0074                 |                 | F(1,16)=9.402  | mixed-effects 2-way ANOVA      |

98

99 **Supplementary Table 1. Statistical details regarding each analysis.**
